# Supplementary material
Source: publisher figshare collection journal article supplement (https://brill.figshare.com/articles/dataset/_/17151713)
Supplement: Supplementary file 1 [file 1]

**The complete mitochondrial genomes of *Notiophilus quadripunctatus* Dejean, 1826 and *Omophron limbatum* (Fabricius, 1777): New insights into the mitogenome phylogeny of the Carabidae (Insecta, Coleoptera)**

Michael J. Raupach<sup>a,\*,\*\*</sup>, Fabian Deister<sup>b</sup>, Adrián Villastrigo<sup>c,\*\*\*</sup> and Michael Balke<sup>c</sup>

<sup>a</sup>Sektion Hemiptera, Bavarian State Collection of Zoology (SNSB–ZSM), Münchhausenstraße

21, 81247 München, Germany

<sup>b</sup>Department of Earth and Environmental Sciences, Palaeontology and Geobiology, Ludwig-

Maximilians-Universität, Richard-Wagner-Straße 10, 80333 München, Germany

<sup>c</sup>Sektion Coleoptera, Bavarian State Collection of Zoology (SNSB–ZSM),

Münchhausenstraße 21, 81247 München, Germany

\*Corresponding author, e-mail: raupach@snsb.de

\*\*ORCID: 0000-0001-8299-6697

\*\*\*ORCID: 0000-0002-3531-0821

**Supplementary material**
