# Supplementary material
Source: publisher figshare collection journal article supplement (https://brill.figshare.com/articles/dataset/_/17151713)
Supplement: Supplementary file 2 [file 1]

| Family         | Subfamily           | Tribus              | Species                                      | Accession Number | Reference                 |
|----------------|---------------------|---------------------|----------------------------------------------|------------------|---------------------------|
| Dytiscidae     |                     |                     | <i>Hydroporus planus</i>                     | MW465248         | Villastrigo et al. 2021   |
|                |                     |                     | <i>Lioporeus pilatei</i>                     | MW465253         | Villastrigo et al. 2021   |
|                |                     |                     | <i>Mystonectes coelamboides</i>              | MW465255         | Villastrigo et al. 2021   |
|                |                     |                     | <i>Nebrioporus vagrans</i>                   | MW465258         | Villastrigo et al. 2021   |
|                |                     |                     | <i>Rhithrodytes bimaculatus</i>              | MW465264         | Villastrigo et al. 2021   |
| Trachypachidae |                     |                     | <i>Trachypachus holmbergi</i>                | EU877954         | Sheffield et al. 2008     |
| Cicindelidae   |                     | Cicindelini         | <i>Cicindela anchoralis</i>                  | MG253029         | Wang et al. 2018          |
|                |                     | Manticorini         | <i>Manticora tibialis</i>                    | MF497821         | López-López & Vogler 2017 |
|                |                     | Collyridini         | <i>Pogonostoma subtiligrossum</i>            | MF497820         | López-López & Vogler 2017 |
|                |                     | Megacephalini       | <i>Omus cazieri</i>                          | MF497813         | López-López & Vogler 2017 |
| Carabidae      | Brachinae           | Brachini            | <i>Brachinus crepitans</i>                   | JX412826         | No reference              |
|                | Broscinae           | Broscini            | <i>Broscus cephalotes</i>                    | MF497819         | López-López & Vogler 2017 |
|                | Carabinae           | Carabini            | <i>Calosoma sp.</i>                          | GU176340         | Song et al. 2010          |
|                | Carabinae           | Carabini            | <i>Carabus (Eucarabus) arvensis</i>          | MN122835         | DNAmark project           |
|                | Carabinae           | Carabini            | <i>Carabus (Acoptolabrus) changeonleei</i>   | MG253028         | Wang et al. 2019          |
|                | Carabinae           | Carabini            | <i>Carabus (Oreocarabus) hortensis</i>       | MN122850         | DNAmark project           |
|                | Carabinae           | Carabini            | <i>Carabus (Carabus) granulatus</i>          | MN122870         | DNAmark project           |
|                | Carabinae           | Carabini            | <i>Carabus (Damaster) lafossei</i>           | KY992943         | Liu et al. 2018           |
|                | Carabinae           | Carabini            | <i>Carabus (Acoptolabrus) mirabilissimus</i> | GQ344500         | Wan et al. 2012           |
|                | Carabinae           | Carabini            | <i>Carabus (Coptolabrus) smaragdinus</i>     | MN480425         | Oh et al. 2019            |
|                | Elaphrinae          | Elaphrini           | <i>Blethisa multipunctata</i>                | KX087243         | No reference              |
|                | Elaphrinae          | Elaphrini           | <i>Elaphrus cupreus</i>                      | KX087286         | No reference              |
|                | Harpalinae          | Harpalini           | <i>Harpalus pennsylvaticus</i>               | MN245975         | Kieran 2020               |
|                | Harpalinae          | Harpalini           | <i>Harpalus sinicus</i>                      | MN310888         | Yu et al. 2019            |
|                | Harpalinae          | Hexagoniini         | <i>Hexagonia terminalis</i>                  | JX412768         | No reference              |
|                | Harpalinae          | Panagaeini          | <i>Craspedophorus nobilis</i>                | JX412738         | No reference              |
|                | Harpalinae          | Platynini           | <i>Agonum muelleri</i>                       | JX412835         | No reference              |
|                | Harpalinae          | Pterostichini       | <i>Abax parallelepipedus</i>                 | KT876877         | Linard et al. 2016        |
|                | Harpalinae          | Pterostichini       | <i>Abax parallelus</i>                       | KX087231         | No reference              |
|                | Harpalinae          | Pterostichini       | <i>Pterostichus madidus</i>                  | KT876910         | Linard et al. 2016        |
|                | Harpalinae          | Pterostichini       | <i>Pterostichus niger</i>                    | KX087231         | No reference              |
|                | Harpalinae          | Pterostichini       | <i>Pterostichus oblongopunctatus</i>         | MN122833         | DNAmark project           |
|                | Harpalinae          | Pterostichini       | <i>Stomis pumicatus</i>                      | KX087349         | No reference              |
|                | Harpalinae          | Zabrini             | <i>Amara aulica</i>                          | MN335930         | Li et al. 2020            |
|                | Harpalinae          | Zabrini             | <i>Amara communis</i>                        | KX035135         | No reference              |
|                | Lebiinae            | Lebiini             | <i>Calleida angusticollis</i>                | JX412855         | No Reference              |
|                | Lebiinae            | Lebiini             | <i>Lebia chlorocephala</i>                   | KX087304         | No Reference              |
|                | Nebriinae           | Nebriini            | <i>Nebria brevicollis</i>                    | KT876906         | Linard et al. 2016        |
|                | <b>Nebriinae</b>    | <b>Notiophilini</b> | <b><i>Notiophilus quadripunctatus</i></b>    | <b>MW800883</b>  | <b>This study</b>         |
|                | <b>Omophroninae</b> | <b>Omophronini</b>  | <b><i>Omophron limbatum</i></b>              | <b>MW800882</b>  | <b>This study</b>         |
|                | Paussinae           | Metriini            | <i>Metrius contractus</i>                    | MF497817         | López-López & Vogler 2017 |
|                | Promecognathinae    | Promecognathini     | <i>Promecognathus crassus</i>                | JX313665         | No reference              |
|                | Scaritinae          | Scaritini           | <i>Scarites buparius</i>                     | MF497822         | López-López & Vogler 2017 |

|  |           |            |                            |          |              |
|--|-----------|------------|----------------------------|----------|--------------|
|  | Trechinae | Bembidiini | <i>Bembidion varium</i>    | KX087242 | No Reference |
|  | Trechinae | Bembidiini | <i>Tachyta nana</i>        | KX035142 | No Reference |
|  | Trechinae | Pogonini   | <i>Pogonus iridipennis</i> | KX087338 | No Reference |
|  | Trechinae | Trechini   | <i>Trechoblemus micros</i> | KX035144 | No Reference |

## References

- Kieran, T.J. (2020) Mitochondrial, metagenomic, and phylogenetic analysis of the ground beetle *Harpalus pennsylvanicus* (Coleoptera: Carabidae). *Gene* **740**: 144540.
- Li, Z., Li, X., Song, N., Tang, H. & Yin, X. (2020) The mitochondrial genome of *Amara aulica* (Coleoptera, Carabidae, Harpalinae) and insights into the phylogeny of ground beetles. *Genes* **11**: 181.
- Linard, B., Crampton-Platt, A., Moriniere, J., Timmermans, M.J.T.N., Andujar, C., Arribas, P., Miller, K.E., Lipecki, J., Favreau, E., Hunter, A., Gomez-Rodriguez, C., Barton, C., Nie, R., Gillett, C.P.D.T., Breeschoten, T., Bocak, L. & Vogler, A.P. (2018) The contribution of mitochondrial metagenomics to large-scale data mining and phylogenetic analysis of Coleoptera. *Molecular Phylogenetics and Evolution* **128**: 1-11.
- Liu, N., Wang, S., Yang, X., Song, J., Wu, J. & Fang, J. (2018) The complete mitochondrial genome of *Carabus (Damaster) lafossei* (Coleoptera: Carabidae). *Conservation Genetics Resources* **10**: 157-160.
- López-López, A. & Vogler, A.P. (2017) The mitogenome phylogeny of Adephaga (Coleoptera). *Molecular Phylogenetics and Evolution* **114**: 166-174.
- Oh, D.-J., Yang, K.-S. & Jung, Y.-H. (2019) The mitochondrial genome of the jeju ground beetle *Carabus smaragdinus monilifer* (Coleoptera, Carabidae). *Mitochondrial DNA Part B* **5**: 39-40.
- Sheffield, N.C., Song, H., Cameron, S.L. & Whiting, M.F. (2008) A comparative analysis of mitochondrial genomes in Coleoptera (Arthropoda: Insecta) and genome descriptions of six new beetles. *Molecular Biology and Evolution* **25**: 2499-2509.
- Song, H., Sheffield, N.C., Cameron, S.L., Miller, K.B. & Whiting, M.F. (2010) When phylogenetic assumptions are violated: base compositional heterogeneity and among-site rate variation in beetle mitochondrial phylogenomics. *Systematic Entomology* **35**: 429-448.
- Villastrigo, A., Abellán, P. & Ribera, I. (2021) Habitat preference and diversification rates in a speciose lineage of diving beetles. *Molecular Phylogenetics and Evolution* **159**: 107087.

Wan, X., Hong, M.Y., Liao, A., Kim, M.I., Kim, K.-G., Han, Y.S. & Kim, I. (2012) Complete mitochondrial genome of a carabid beetle, *Acoptolabrus mirabilissimus mirabilissimus* (Coleoptera: Carabidae). *Entomological Research* **42**: 44-54.

Wang, A.R., Kim, M.J., Joeng, S.Y. & Kim, I. (2018) Complete mitochondrial genome sequence of *Cicindela anchoralis* Chevrolat, 1845 (Coleoptera: Carabidae). *Mitochondrial DNA Part B* **3**: 282-283.

Wang, A.R., Kim, M.J., Hong, E.J., Jeong, J.-C., Kim, S.S. & Kim, I. (2019) Complete mitochondrial genome sequence of *Acoptolabrus changeonleei* Ishikawa et Kim, 1983 (Coleoptera: Carabidae). *Mitochondrial DNA B Resources* **4**: 1883-1885.

Yu, X., Tan, W., Zhang, H., Jiang, W., Gao, H., Wang, W., Liu, Y., Wang, Y. & Tian, X. (2019) Characterization of the complete mitochondrial genome of *Harpalus sinicus* and its implications for phylogenetic analyses. *Genes* **10**: 724.
